# Supplementary material for: Facile Fabrication of Highly Hydrophobic Onion-like Candle Soot-Coated Mesh for Durable Oil/Water Separation
Source: MDPI journal article supplement (doi:10.3390/nano12050761), 2022-02-24
Supplement: s1 [file s1]

# Facile Fabrication of Highly Hydrophobic Onion-Like Candle Soot Coated Mesh for Durable Oil/Water Separation

Jiajia Song <sup>1,†</sup>, Na Liu <sup>2,†</sup>, Jiakai Li <sup>1</sup>, Yingze Cao <sup>3,\*</sup> and Haijie Cao <sup>1,\*</sup>

<sup>1</sup> Institute of Materials for Energy and Environment, College of Materials Science and Engineering, Qingdao University, Qingdao 266071, China; songjiajia540819@163.com (J.S.); 2019025733@qdu.edu.cn (J.L.)

<sup>2</sup> Department of Chemistry, Tsinghua University, Beijing 100084, China; liun12@tsinghua.org.cn (N.L.);

<sup>3</sup> Qian Xuesen Laboratory of Space Technology, China Academy of Space Technology, Beijing 100094, China

\* Correspondence: caoyingze@qxslab.cn (Y.C.); caohj1582@hotmail.com (H.C.)

† These authors contributed equally to this work.

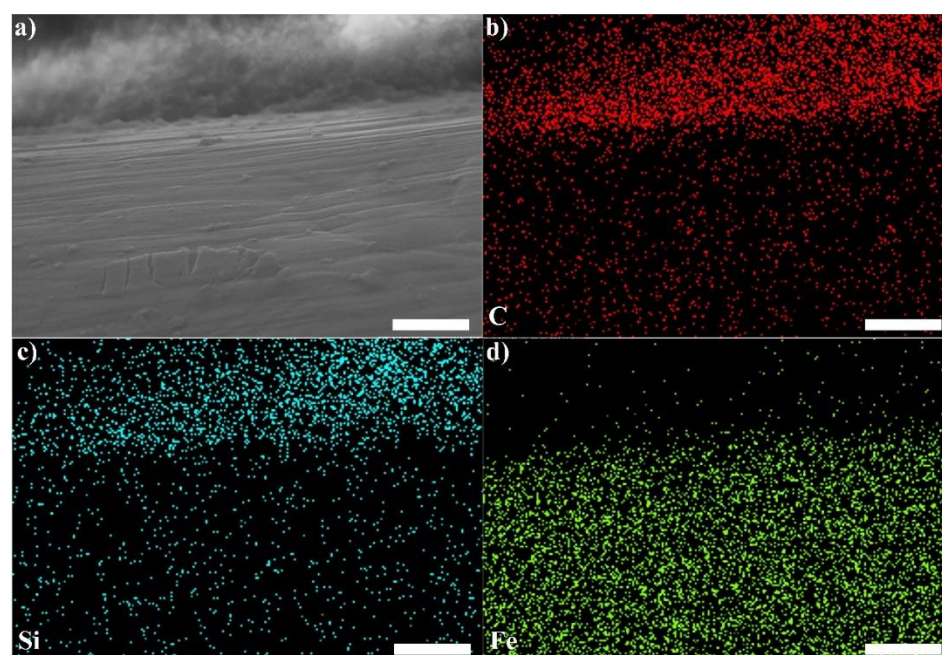

**Figure S1.** (a) SEM image of glued SSM. (b-d) Corresponding elemental mapping images of glued SSM. The scale bar is 1  $\mu$ m.

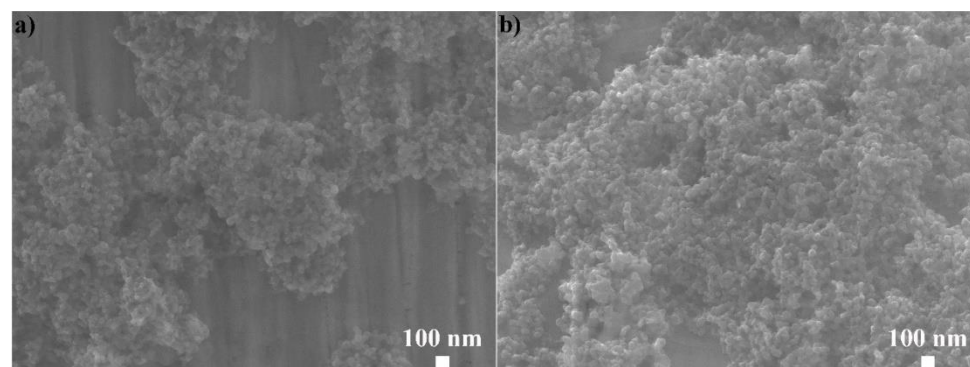

**Figure S2.** SEM images of the fabricated meshes at different coating times: (a) 5 min and (b) 1 h.

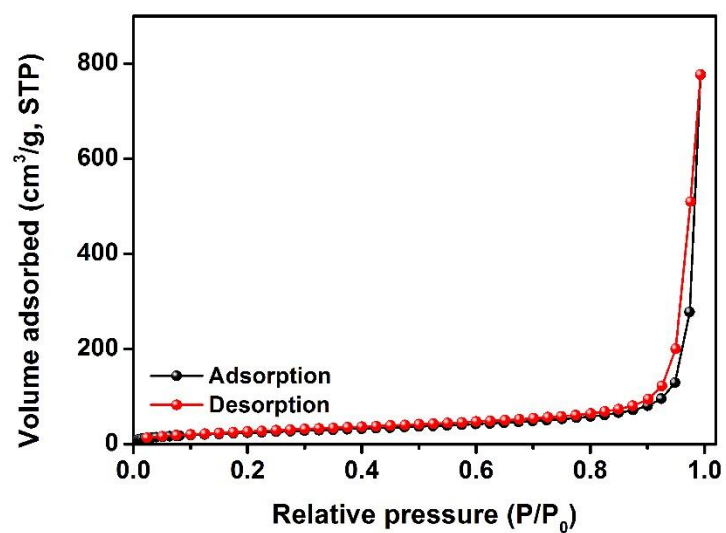

**Figure S3.** Nitrogen adsorption/desorption isotherm curve of CS powders.

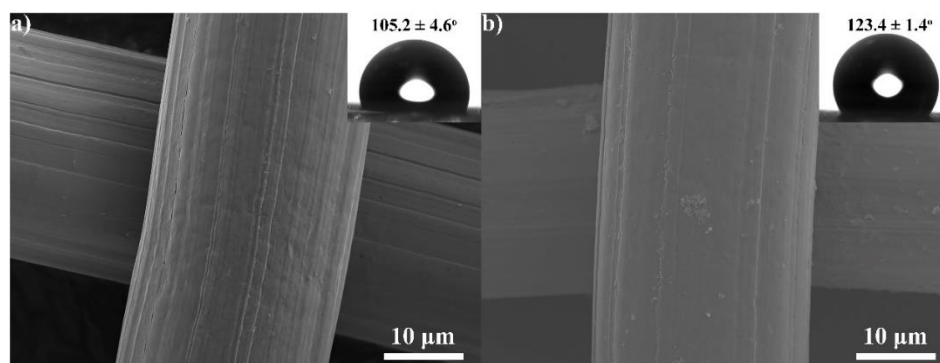

**Figure S4.** SEM images of (a) the pristine SSM and (b) CS coated SSM without glue pretreated, insets were the corresponding water CAs.

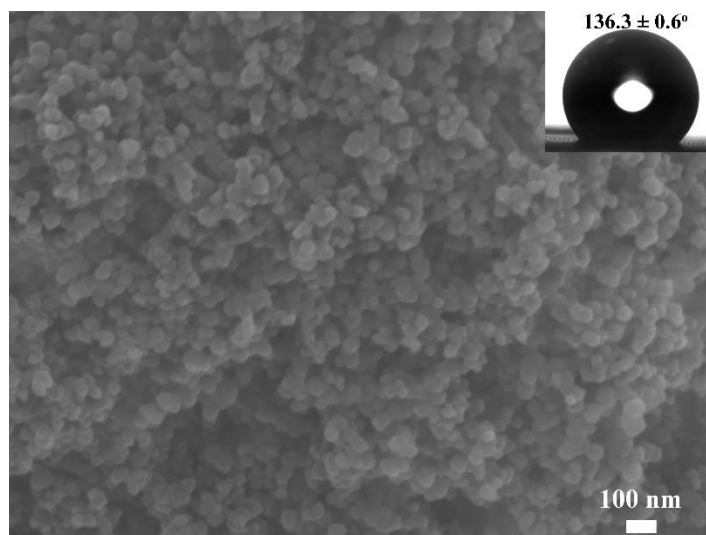

**Figure S5.** SEM image of CS coated mesh after ultrasonic worn for 2 h, inset was the corresponding water CA.

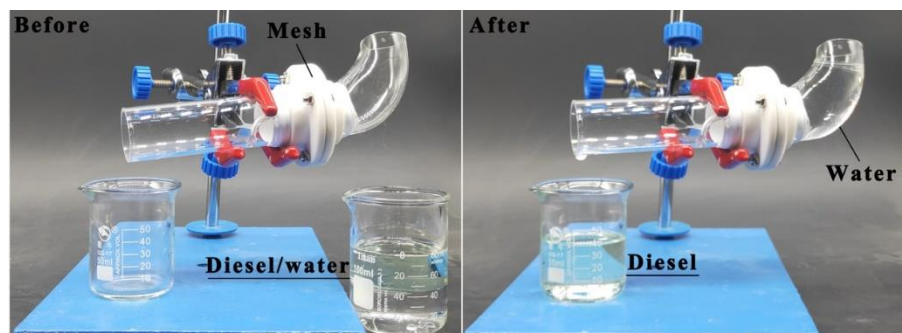

**Figure S6.** Separation process of diesel/water mixture by the CS coated mesh.

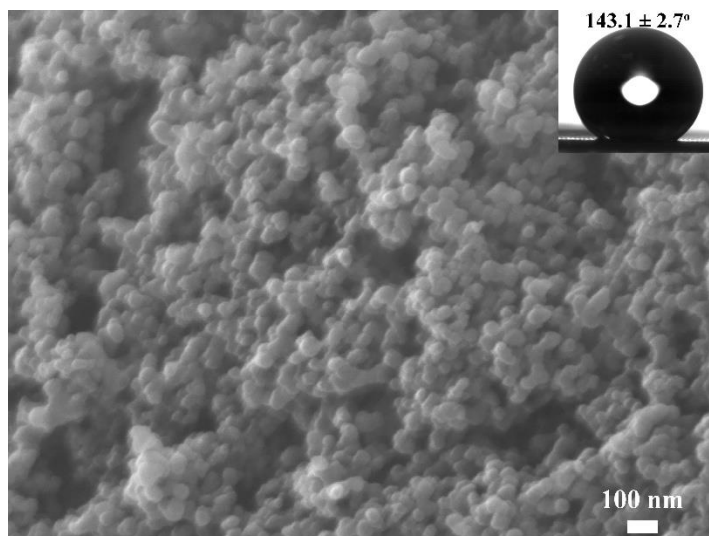

**Figure S7.** SEM image of CS coated mesh after being repeatedly utilized for 20 cycles of oil/water separation tests, inset was the corresponding water CA.

**Video S1.** Continuous water droplets from the pipet readily bounced off the surface of CS coated mesh.

**Video S2.** Removal process of a drop of  $\text{CCl}_4$  dyed with Sudan III from water.

**Video S3.** Separation process of light oil (hexane)/water mixture.

**Video S4.** Separation process of heavy oil ( $\text{CCl}_4$ )/water mixture.
